# Supplementary material for: Aging Impairs the Cellular Interplay between Myeloid Cells and Mesenchymal Cells during Skin Healing in Mice
Source: PubMed Central journal article supplement (PMC8947831; doi:10.14336/ad.2021.1008), 2022-04-01
Supplement: AD-13-2-540-s.pdf [file AD-13-2-540-s.pdf]

## SUPPLEMENTARY DATA

# **Aging Impairs the Cellular Interplay between Myeloid Cells and Mesenchymal Cells during Skin Healing in Mice**

**Saeid Amini-Nik<sup>2,3,4,6,#,\*</sup>, Abdikarim Abdullahi<sup>1,2,#</sup>, Roohi Vinaik<sup>1,2</sup>, Ren Jie Robert Yao<sup>1,2</sup>, Nancy Yu<sup>2</sup>, Andrea Datu<sup>2</sup>, Cassandra Belo<sup>2</sup>, Marc G Jeschke<sup>1,2,4,5,6\*</sup>**

# SUPPLEMENTARY DATA

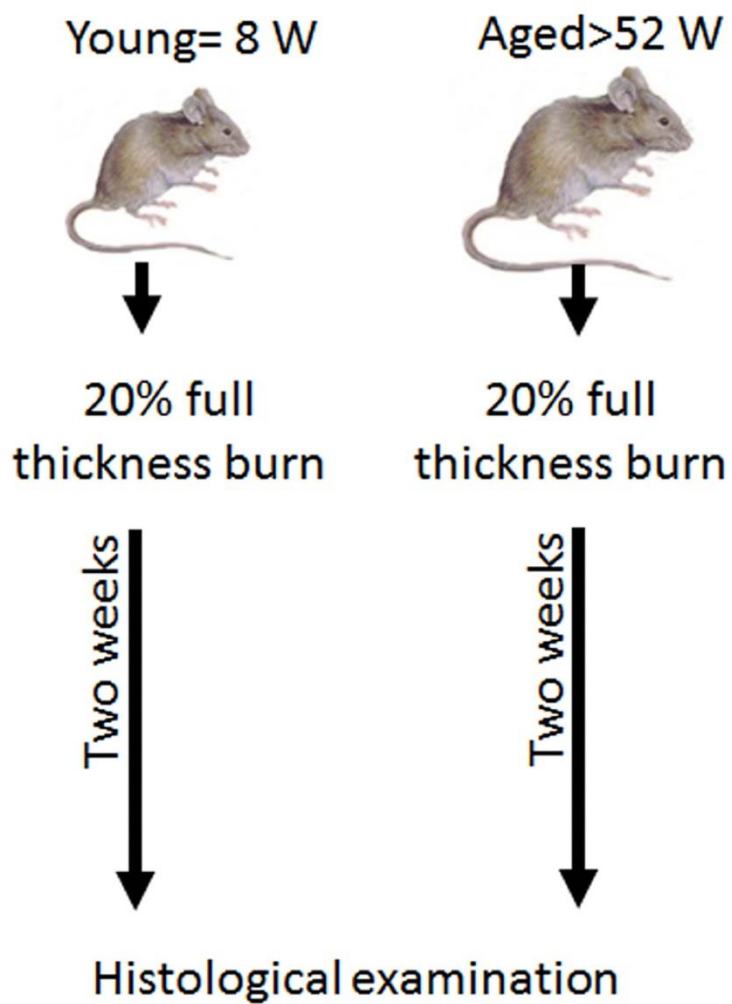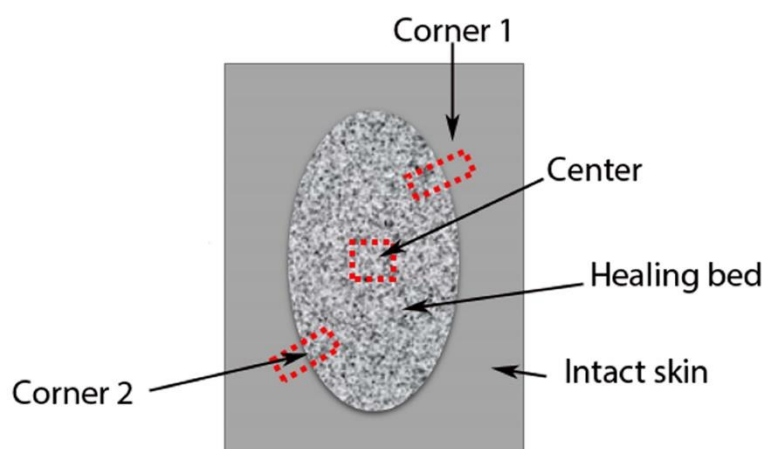

**Supplementary Figure 1.** Thermal injury model on dorsum skin of mice and isolation of healing tissue for histological and other proteomics and transcriptomics approaches.

## SUPPLEMENTARY DATA

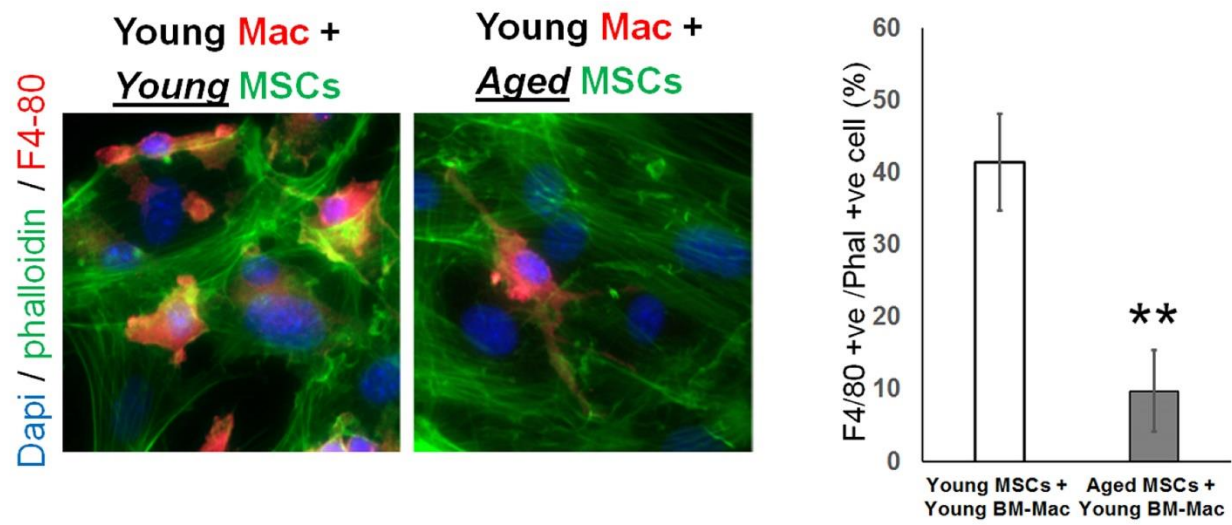

**Supplementary Figure 2. Macrophages adhere to the adult MSCs in a lesser extent.** Fewer EYFP+ macrophages attached to the adult MSCs as compared to young MSCs in adhesion experiments (\*\* P < 0.01, error bars are showing 95% confidence intervals).

SUPPLEMENTARY DATA

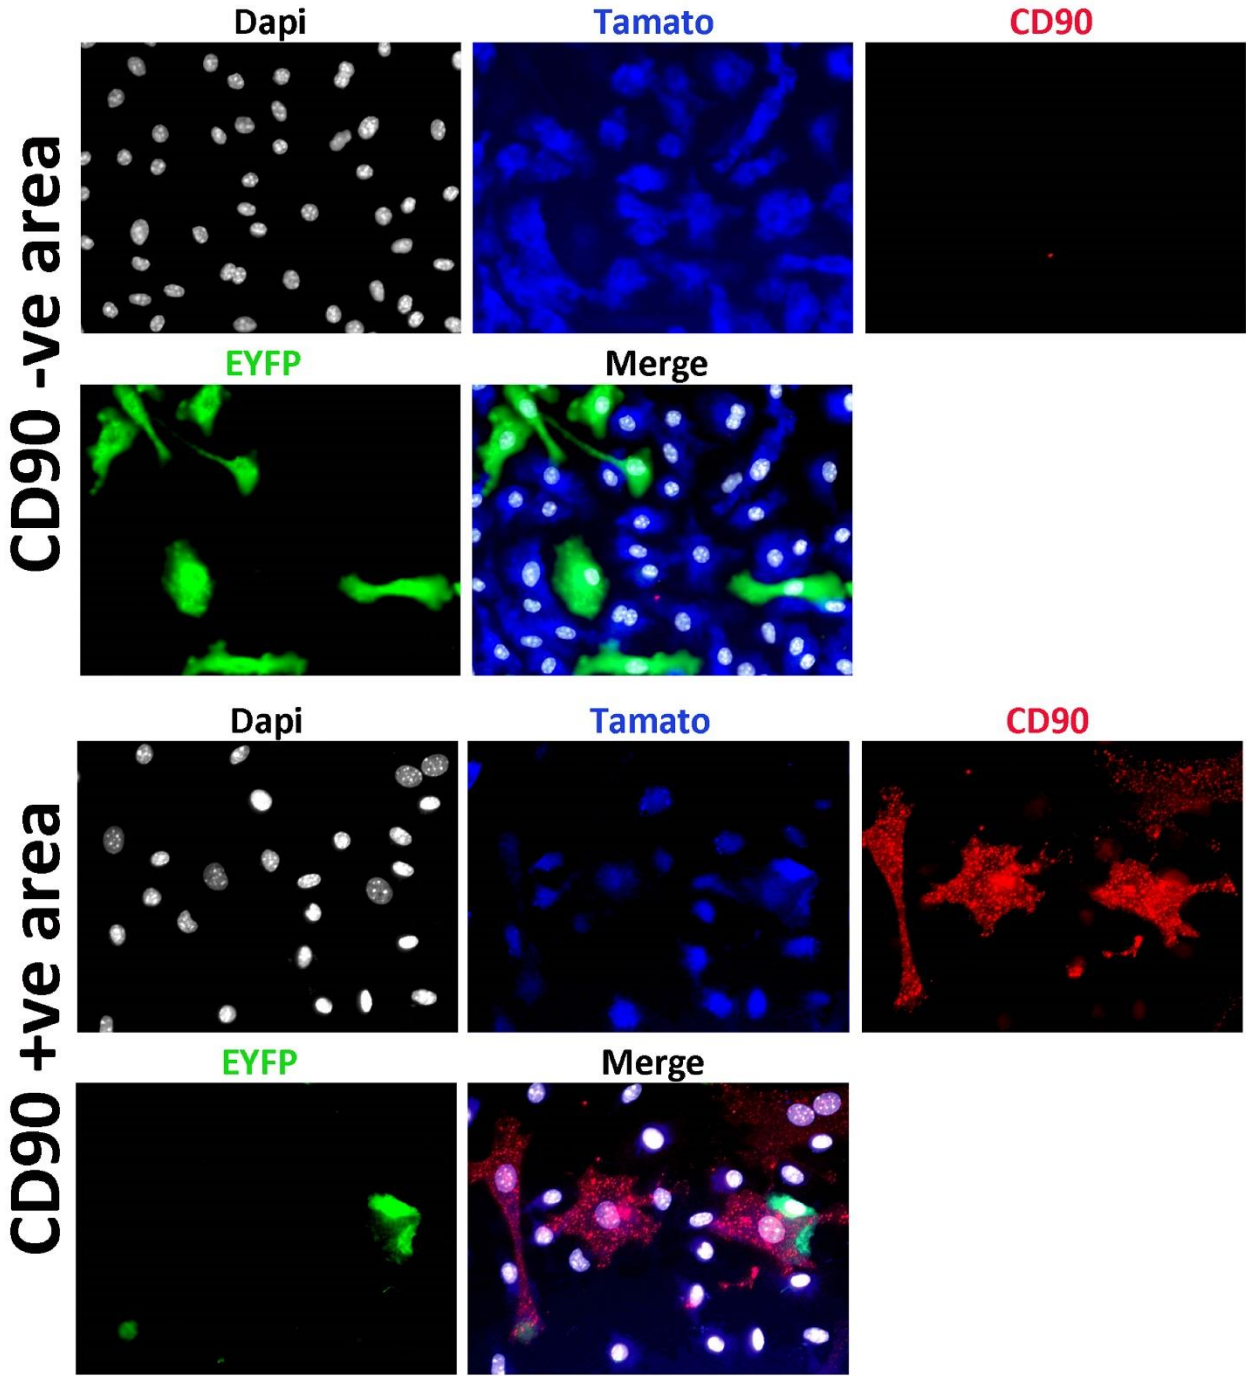

Supplementary Figure 3. Macrophages from young mice preferentially adhere to CD90+ mesenchymal cells.

# SUPPLEMENTARY DATA

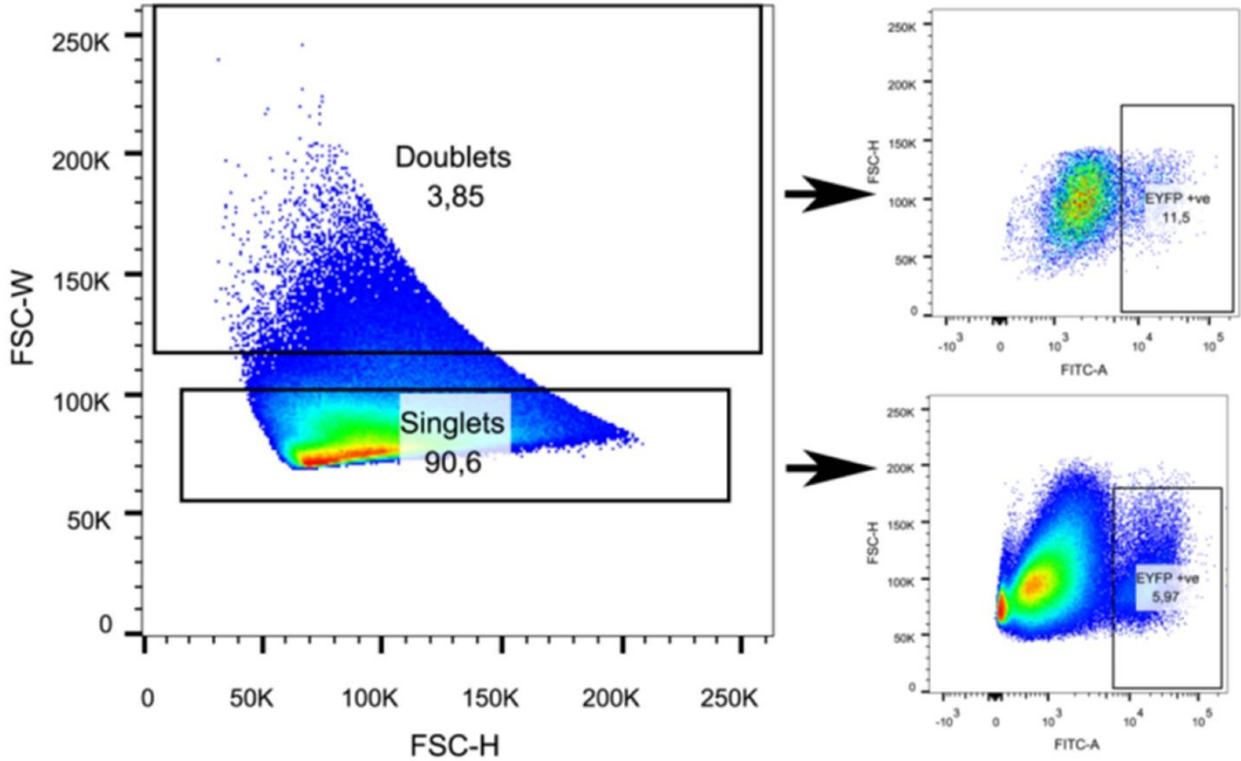

**Supplementary Figure 4. Macrophages, together with CD90+ mesenchymal stem cells, make doublets.** Flow cytometry of trypsinized cells obtained from young mice after adhesion of EYFP+ macrophages is showing that a substantial population of the dissociated viable events are doublets events and the number of EYFP+ macrophages are significantly more in doublet population in compare with singlet population.

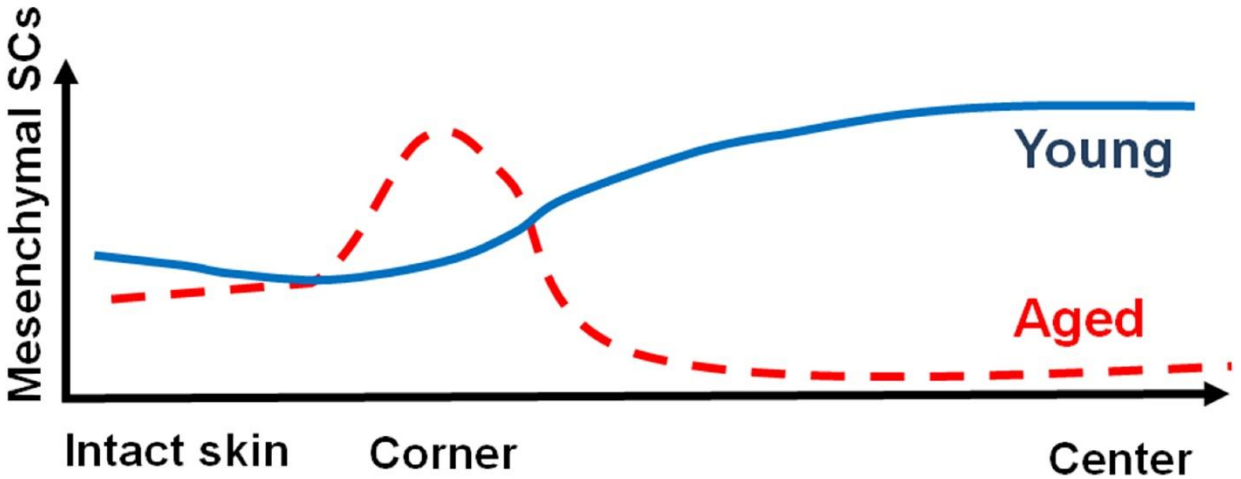

**Supplementary Figure 5. Schematic illustration of the spatial distribution of MSCs in young vs. adult animals.**

## SUPPLEMENTARY DATA

**Supplementary Table 1.** RNA analysis shows the down-regulation of key adhesion genes in CD90-ve MSCs as compared to CD90+ MSCs.

| Symbol | Description                                       | Fold Regulation |
|--------|---------------------------------------------------|-----------------|
| Dpp4   | Dipeptidylpeptidase 4                             | -11.9211        |
| Egf    | Epidermal growth factor                           | -6.1064         |
| Actn3  | Actinin alpha 3                                   | -5.1145         |
| Rho    | Rhodopsin                                         | -4.1576         |
| Cav1   | Caveolin 1, caveolae protein                      | -2.9902         |
| Wasf1  | WASP family 1                                     | -2.6788         |
| Fap    | Fibroblast activation protein                     | -2.5253         |
| Pld1   | Phospholipase D1                                  | -2.3191         |
| Pxn    | Paxillin                                          | -2.0829         |
| Ptpn1  | Protein tyrosine phosphatase, non-receptor type 1 | -2.0278         |

FACS sorted CD90+ and CD90-ve from bone marrow-derived MSCs of young mice show a decreased expression of adhesion-related genes in CD90-ve MSCs.
